# Supplementary material for: Three-Dimensional Reconstruction of Oral Tongue Squamous Cell Carcinoma at Invasion Front
Source: Hindawi journal article supplement (doi:10.1155/2013/482765), 2013-01-01

# Supplementary Material Plate S1

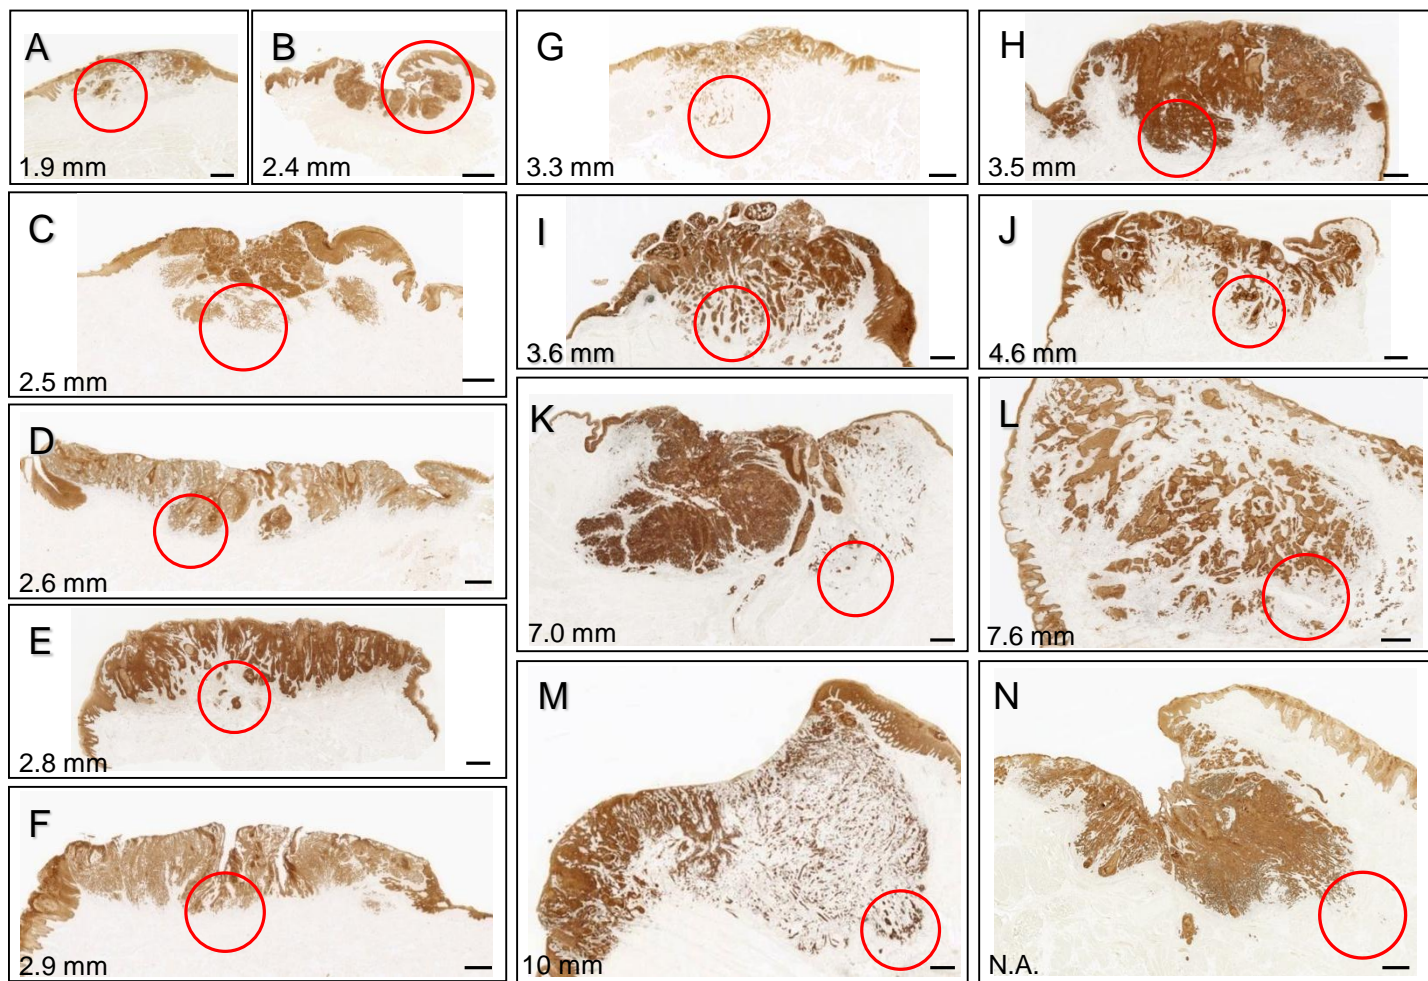

# Supplementary Material Plate S2

## (1) Pushing and bulky architecture

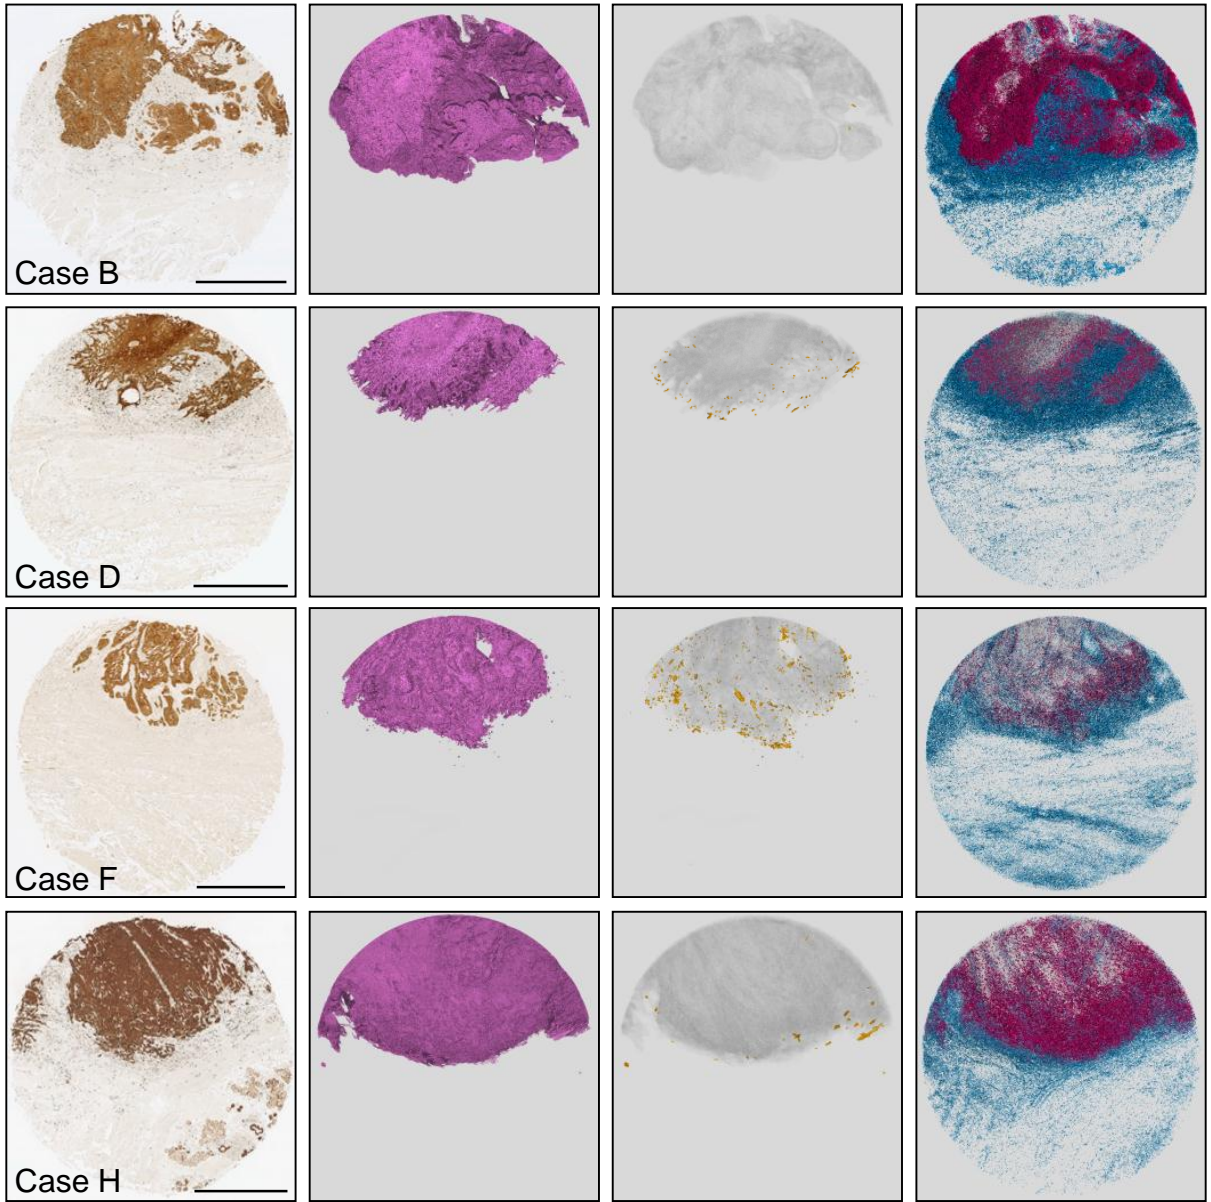

# Supplementary Material Plate S3

## (2) Trabecular architecture

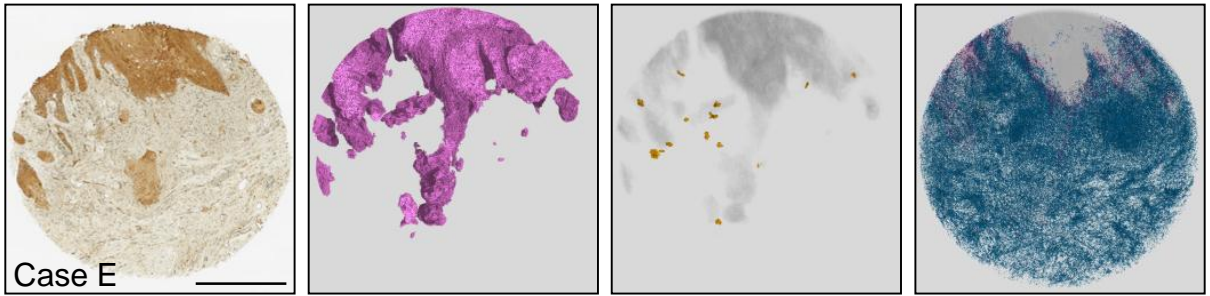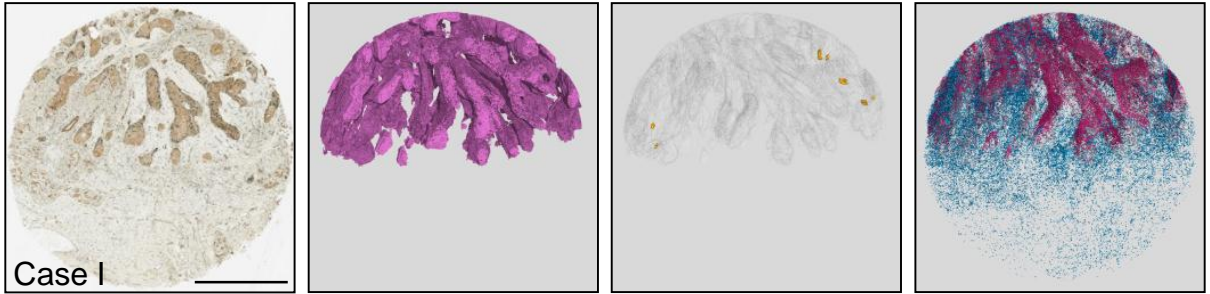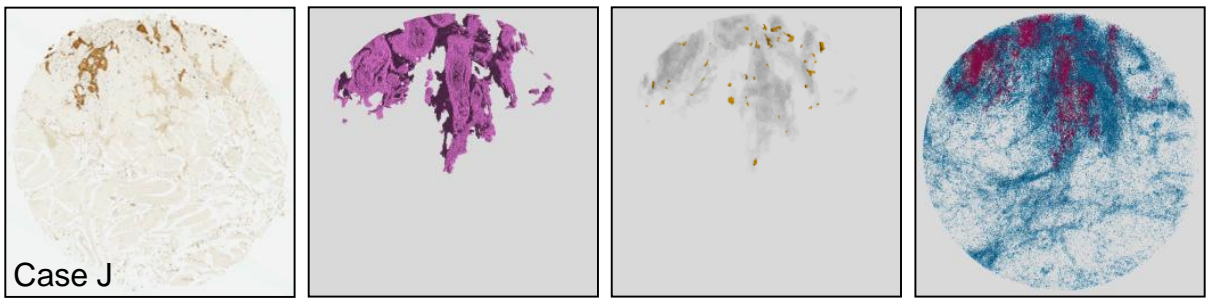

## (3) Diffuse spreading

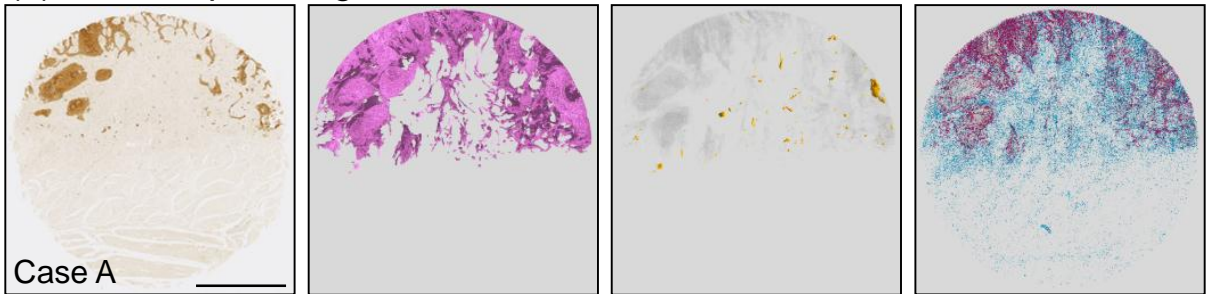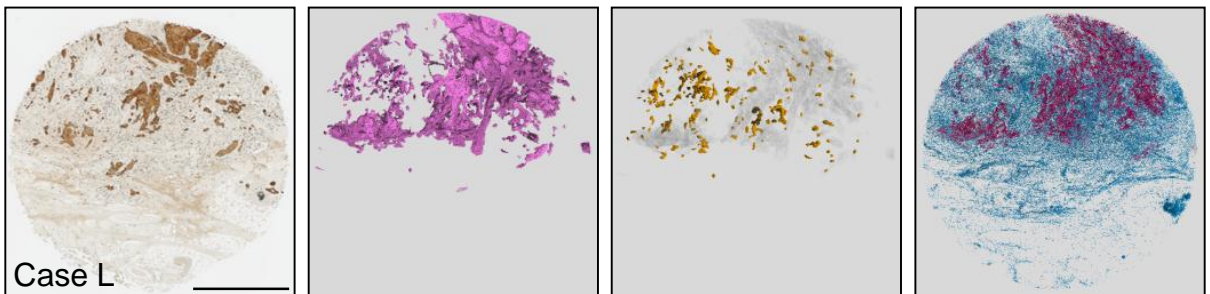

## (4) Special forms

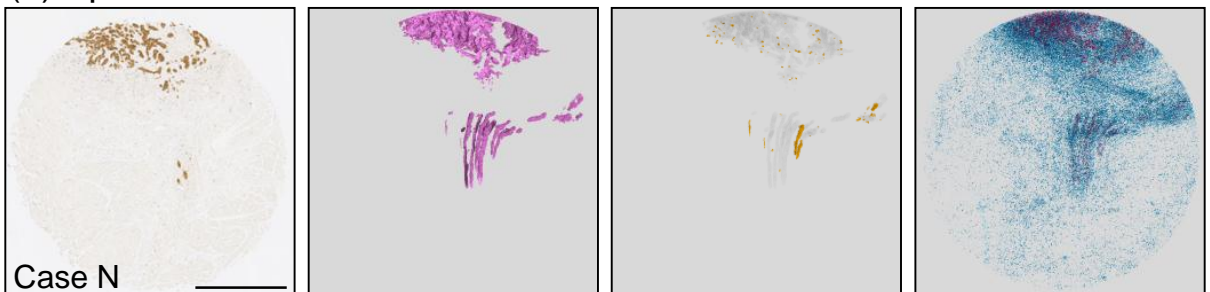

Supplement: f1 [file 482765.f1.pdf]
